# REVIEW: The Role of Insulin Resistance in Nonalcoholic Fatty Liver Disease

Kristina M. Utzschneider and Steven E. Kahn

*Division of Metabolism, Endocrinology and Nutrition, Department of Medicine, Veterans Affairs Puget Sound Health Care System and University of Washington, Seattle, Washington 98108*

**Context:** Insulin resistance is an almost universal finding in non-alcoholic fatty liver disease (NAFLD). This review outlines the evidence linking insulin resistance and NAFLD, explores whether liver fat is a cause or consequence of insulin resistance, and reviews the current evidence for treatment of NAFLD.

**Evidence Acquisition:** Evidence from epidemiological, experimental, and clinical research studies investigating NAFLD and insulin resistance was reviewed.

**Evidence Synthesis:** Insulin resistance in NAFLD is characterized by reductions in whole-body, hepatic, and adipose tissue insulin sensitivity. The mechanisms underlying the accumulation of fat in the liver may include excess dietary fat, increased delivery of free fatty acids to the liver, inadequate fatty acid oxidation, and increased *de novo* lipogenesis. Insulin resistance may enhance hepatic fat accu-

mulation by increasing free fatty acid delivery and by the effect of hyperinsulinemia to stimulate anabolic processes. The impact of weight loss, metformin, and thiazolidinediones, all treatments aimed at improving insulin sensitivity, as well as other agents such as vitamin E, have been evaluated in patients with NAFLD and have shown some benefit. However, most intervention studies have been small and uncontrolled.

**Conclusion:** Insulin resistance is a major feature of NAFLD that, in some patients, can progress to steatohepatitis. Treatments aimed at reducing insulin resistance have had some success, but larger placebo-controlled studies are needed to fully establish the efficacy of these interventions and possibly others in reducing the deleterious effects of fat accumulation in the liver. (*J Clin Endocrinol Metab* 91: 4753–4761, 2006)

NONALCOHOLIC FATTY LIVER disease (NAFLD) is a common hepatic disorder characterized by fat accumulation in the liver (Fig. 1), identical to that seen in alcoholic fatty liver disease, but in patients who do not drink excessive amounts of alcohol. Although simple steatosis (Fig. 1B) is thought to be a benign condition (1, 2), a subset of NAFLD patients develop nonalcoholic steatohepatitis (NASH). Inflammation and evidence of hepatocyte injury on liver biopsy (Fig. 1, C and D) characterize NASH, which has received more attention recently. Ultimately, and of major clinical significance, NASH can progress to fibrosis and cirrhosis (3).

The ectopic accumulation of fat in the liver has been strongly associated with insulin resistance, an almost universal finding in NAFLD (4–10). The underlying mechanisms linking NAFLD and insulin resistance are a major focus of current research. In this review, we examine the evidence that insulin resistance is a key feature of NAFLD and address the various hypotheses regarding the pathophysiology of the disorder.

## Epidemiology of NAFLD

The prevalence of NAFLD is high in conditions associated with insulin resistance such as obesity, type 2 diabetes, dys-

lipidemia, and the metabolic syndrome. Although in the general population the prevalence of NAFLD and NASH is approximately 20 and 3%, respectively (11, 12), in obese populations NAFLD may affect up to 75% of subjects (13). In the morbidly obese, steatosis has been found in almost all subjects (14), with NASH being present in 25–70% of these individuals (14, 15).

NAFLD is also very common in the type 2 diabetes population with between 50 and 75% of subjects demonstrating fat in the liver by ultrasound (16–18). NAFLD, as manifest by elevated alanine aminotransferase levels, predicts the future development of diabetes (19). Additionally, the presence of diabetes has been identified as a risk factor for NASH, with one autopsy series showing a 2.6-fold increased risk of steatohepatitis in individuals who were hyperglycemic (20).

The metabolic syndrome and NAFLD are commonly associated and presence of the metabolic syndrome frequently predicts the future development of NAFLD (21). Forty-eight percent of subjects diagnosed with the metabolic syndrome in one study from China were found to have fatty liver by ultrasound (22). In the same study, fatty liver was diagnosed in 39% of those with a body mass index (BMI) 25 kg/m<sup>2</sup> or greater, in 41% of those with known diabetes, and in 32% of those with dyslipidemia (22). Conversely, in a large multi-ethnic urban U.S. population studied with magnetic resonance spectroscopy (MRS), the presence of increased hepatic triglycerides relative to low triglyceride content was more frequent in those with obesity (BMI > 30 kg/m<sup>2</sup>; 67 vs. 33%), diabetes, and/or fasting glucose more than 110 mg/dl (18 vs. 11%), lipid abnormalities (64 vs. 40%), and the metabolic syndrome (30 vs. 8%) (23).

First Published Online September 12, 2006

Abbreviations: BMI, Body mass index; FFA, free fatty acid; IRS, insulin receptor substrate; MRS, magnetic resonance spectroscopy; NAFLD, nonalcoholic fatty liver disease; NASH, nonalcoholic steatohepatitis; SREBP-1c, sterol receptor binding protein 1-c.

JCEM is published monthly by The Endocrine Society (<http://www.endo-society.org>), the foremost professional society serving the endocrine community.

FIG. 1. Hematoxylin and eosin staining of normal liver (A), simple hepatic steatosis (B), and steatohepatitis (C) characterized by steatosis, inflammation, and hepatocyte ballooning (arrow). D, Hepatic fibrosis (blue) is shown by Masson trichrome staining. Photomicrographs were provided courtesy of Dr. Matthew Yeh (Department of Pathology, University of Washington, Seattle, WA).

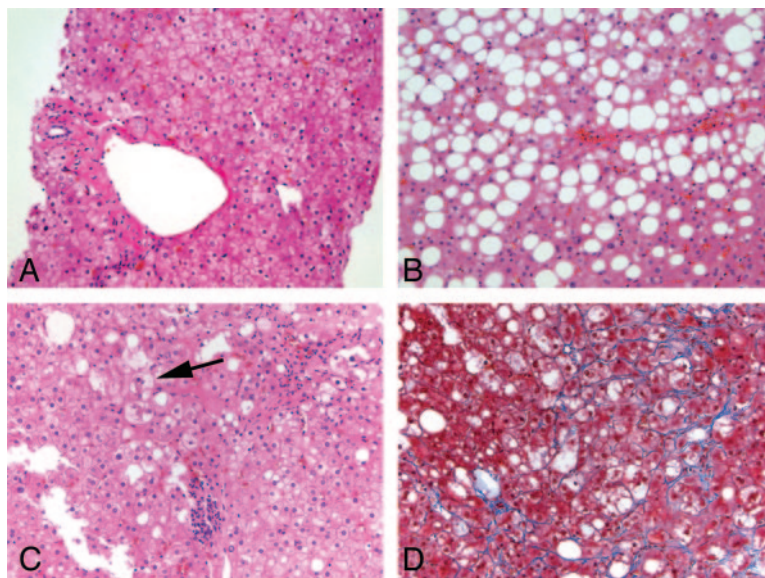

As the prevalence of obesity in the United States continues to increase, with the 1999–2000 National Health and Nutrition Examination Survey showing that 34% of the adult population is overweight and an additional 30.5% is obese (24), the prevalence of NAFLD and NASH is expected to continue to rise. Furthermore and alarmingly, the increase in obesity in children is now being paralleled by the observation of NASH even in youth (25, 26).

Obesity is certainly the most common factor associated with NAFLD. However, other causes of NAFLD have also been recognized and include medications such as estrogens, tamoxifen, high-dose glucocorticoids, and amiodarone, alterations in nutrition and bowel absorption such as jejunoleal bypass, rapid weight loss, total parenteral nutrition, occupational exposure to hepatotoxins, familial syndromes of severe insulin resistance such as lipodystrophy, and disorders of lipid metabolism such as apolipoprotein B deficiency (27).

### Insulin Resistance in NAFLD

NAFLD is strongly associated with both hepatic and adipose tissue insulin resistance (28–30) as well as reduced whole-body insulin sensitivity (28, 29). These studies have documented 45–50% reductions in glucose disposal, a measure of whole-body insulin sensitivity (28, 29), and an impaired ability of insulin to suppress endogenous glucose production, indicative of hepatic insulin resistance (28–30). Additionally, subjects with NAFLD exhibit a defect in insulin suppression of free fatty acids (FFA), in keeping with insulin resistance at the level of the adipocyte (24–26). Compared with control subjects, subjects with NAFLD also demonstrate a blunted inhibition of fatty acid oxidation, reflecting the decreased uptake and use of glucose as a source of fuel (29). These findings suggest the possibility that insulin resistance may be an intrinsic defect in NAFLD, and that diminished insulin responsiveness at the level of the adipocyte may contribute to hepatic steatosis by excess FFA flux to the liver.

### Obesity, Adipokines, Inflammation, and NAFLD

Although overall obesity is clearly associated with NAFLD, body fat distribution appears to play an important role in the pathogenesis of NAFLD. Excess intraabdominal fat in particular may be a key determinant in the pathogenesis of NAFLD, via both its strong association with insulin resistance and possibly as a source of FFAs. Intraabdominal fat accumulation is well recognized to be associated with insulin resistance and central adiposity, so that, even in lean individuals, the accumulation of fat in this depot is associated with reduced insulin sensitivity (31). Increased intraabdominal fat deposition is also associated with what are commonly considered to be clinical manifestations associated with insulin resistance, including type 2 diabetes (32, 33), impaired glucose tolerance (34), dyslipidemia (35, 36), and the metabolic syndrome (37). Furthermore, accumulation of intraabdominal fat has also been positively correlated with liver fat (38, 39) and hepatic insulin resistance in both men and women (33).

However, evidence also suggests that liver fat may be associated with insulin resistance independent of intraabdominal fat (30, 38). Lean nondiabetic men with increased liver fat quantified by MRS had both hepatic and adipose tissue insulin resistance, manifest as impaired insulin suppression of glucose production and serum FFAs, when compared with subjects well matched for both BMI and intraabdominal fat, but with low levels of hepatic fat (30). Finally, in women with a history of gestational diabetes, hepatic fat has also been shown to correlate independently of intraabdominal fat with fasting insulin and with features of the metabolic syndrome such as hypertriglyceridemia and hypertension (9).

Although most studies have found intraabdominal fat to be more strongly associated with whole-body insulin resistance, sc fat is also important in NAFLD. Subcutaneous fat makes up the greatest proportion of the total fat mass, and total fat mass may be an important predictor of hepatic

insulin sensitivity. Although intraabdominal fat is more strongly correlated with total glucose disposal during a hyperinsulinemic euglycemic clamp, deep sc fat has also been shown to be associated with total glucose disposal during the low-dose clamp (33). However, in this study, total fat mass was the only independent predictor of hepatic insulin sensitivity in type 2 diabetic subjects (33). Subcutaneous fat, because of its greater overall mass, contributes more than intraabdominal fat to circulating FFAs, although the proximity of intraabdominal fat to the liver could create a portal-peripheral gradient for FFAs entering the liver. Fifty-nine percent of the triacylglycerol that accumulates in the liver in subjects with NAFLD is derived from circulating FFAs (40) and most of this is from nonsplanchnic sources. In lean healthy subjects during the postabsorptive phase, only about 15% of the systemic FFA flux is accounted for by visceral fat, whereas 75% is derived from the upper body and only 10% from the lower extremities (41). In subjects with type 2 diabetes, whereas overall FFA release is higher than in nondiabetic subjects, the relative contributions of upper body, splanchnic, and lower body fractional release did not differ between groups (42).

Interestingly, although excess intraabdominal and overall fat mass are associated with NAFLD, adipose tissue is not required. Humans with generalized lipodystrophy lack both sc and intraabdominal fat, but are characterized by severe insulin resistance and hepatic steatosis (43). The accumulation of ectopic fat may be a result of the severe insulin resistance, lack of adipose tissue-derived hormones such as adiponectin and leptin, or lack of fat as a storage depot, leading to fat storage in the liver. Currently, the exact mechanisms underlying insulin resistance and steatosis in lipodystrophy are not known.

The mechanism(s) whereby increased visceral adiposity is associated with insulin resistance is unclear, but circulating hormones secreted from adipose tissue have been implicated in modulating insulin sensitivity. Adiponectin is one of these adipokines, and we have found it to be associated positively with insulin sensitivity and associated negatively with intraabdominal fat (44). Adiponectin stimulates glucose use and fatty acid oxidation in the liver by activating AMP-activated protein kinase (45). Thus, low levels of adiponectin may play a role in the pathogenesis of NAFLD by decreasing fatty acid oxidation in the liver. Adiponectin levels have been found to be significantly lower in subjects with NAFLD or NASH compared with BMI-matched controls (46), and adiponectin levels have also been found to correlate negatively with hepatic fat (46, 47). Treatment of type 2 diabetic subjects with pioglitazone increases adiponectin levels, and this has been associated with decreases in hepatic fat (48). In this particular study, adiponectin levels were correlated negatively with hepatic fat content and correlated positively with hepatic and peripheral insulin sensitivity both pretreatment and posttreatment (48). Further support for an important role of adiponectin comes from a mouse model of steatohepatitis induced by a high-fat/alcohol diet, in which adiponectin administration alleviated hepatic steatosis and significantly attenuated hepatic inflammation and elevated levels of transaminases by increasing fatty acid oxidation in the liver

and decreasing the activities of enzymes involved in fatty acid synthesis (49).

The inflammatory cytokines IL-6 and TNF $\alpha$  are also secreted from fat and are known to be elevated in obesity and insulin-resistant states (50–52). It is possible that they may be mediators of insulin resistance because plasma levels of both have been correlated negatively with insulin sensitivity (52–56). Furthermore, it has been demonstrated that the plasma levels of these two inflammatory cytokines are increased in subjects with NAFLD (38) and NASH (57, 58) and that peripheral blood monocyte production of TNF $\alpha$  and IL-6 is increased in subjects with NASH (58). A more detailed evaluation of the role of TNF $\alpha$  in NASH has demonstrated overexpression of TNF $\alpha$  mRNA in both the liver and adipose tissue, suggesting that the TNF $\alpha$  system may be of importance in the pathogenesis of NASH (59).

Thus, the pathogenesis of hepatic steatosis is complex with intraabdominal fat, adipokines, and inflammation all appearing to be involved to some extent. However, their relative importance in the accumulation of hepatic fat and development of insulin resistance remains to be resolved.

### Potential Mechanisms for Hepatic Fat Accumulation

Fatty acids in the liver come from several different sources: derived from dietary fat, released from adipocytes via lipolysis, and from *de novo* hepatic lipogenesis (Fig. 2). An imbalance of any of the pathways involved in triacylglycerol delivery, synthesis, export, or oxidation could contribute to its accumulation in the liver. Using stable isotope labeling techniques, it has been demonstrated recently that, in subjects with NAFLD on a controlled diet that contained 30% of calories from fat, nearly 60% of the liver triacylglycerol was derived from circulating FFAs, 26% from *de novo* lipogenesis, and 15% from the diet (40). This would suggest that, in the absence of a high-fat diet, overproduction of fatty acids from adipose tissue is the most likely source of excess triglyceride accumulating in the liver. As high-fat diets have been shown to produce fatty liver in both animal (60, 61) and human (62)

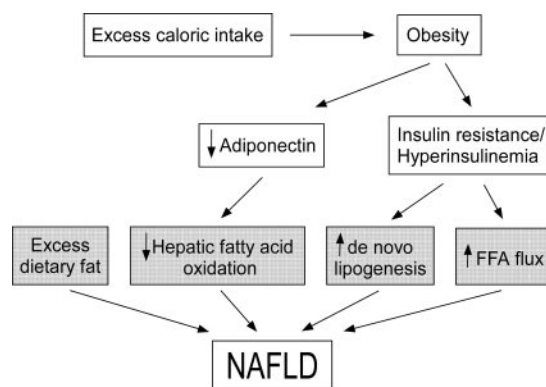

FIG. 2. Diagram of potential sources of and mechanisms for the accumulation of fat in the liver. Excess caloric intake plays a central role directly via excess dietary fat intake and indirectly by leading to obesity and thus contributing to insulin resistance. Obesity may additionally impact fat accumulation in the liver by decreasing adiponectin levels, thus contributing to inadequate fatty acid oxidation. Insulin resistance contributes to NAFLD directly by increasing *de novo* lipogenesis and indirectly by increasing FFA flux to the liver via decreased inhibition of lipolysis.

**TABLE 1.** Clinical trials targeting insulin resistance in NAFLD and NASH

| Ref.                     | n (male/female) | Age (yr)<br>mean ± SD (range) | Subjects                      | NAFLD or NASH       |
|--------------------------|-----------------|-------------------------------|-------------------------------|---------------------|
| Weight loss              |                 |                               |                               |                     |
| Park (79)                | 25 (19/6)       | 38 ± 13 (13–61)               | Obese                         | NAFLD by ultrasound |
| Ueno (80)                | 25 (13/12)      | 39 ± 13 (9–52)                | Obese                         | NAFLD by ultrasound |
| Clark (117)              | 16 (8/8)        | 44 ± 8 (NR)                   | Morbidly obese                | 15/16 NASH          |
| Huang (82)               | 16 (8/8)        | 50 ± 12 (NR)                  | NASH                          | NASH                |
| Metformin                |                 |                               |                               |                     |
| Nair (89)                | 15 (9/6)        | 51 ± 12 (NR)                  | One with DM                   | NAFLD or NASH       |
| Marchesini (90)          | 20 (14/6)       | Median 40 (27–59)             | Non-DM                        | NAFLD by ultrasound |
| Uygun (92)               | 34 (21/13)      | 41 ± 10 (22–64)               | Non-DM                        | NASH                |
| Bugianesi (91)           | 110 (91/19)     | 42 ± 10 (21–68)               | Non-DM                        | NAFLD or NASH       |
| Thiazolidinediones       |                 |                               |                               |                     |
| Troglitazone             |                 |                               |                               |                     |
| Caldwell (118)           | 10 (0/10)       | 44 ± 16 (23–69)               | One with DM                   | NASH                |
| Pioglitazone             |                 |                               |                               |                     |
| Promrat (76)             | 18 (7/11)       | 46 ± 11 (NR)                  | Non-DM                        | NASH                |
| Sanyal (75)              | 20 (10/10)      | 46 ± 13 (NR)                  | Non-DM                        | NASH                |
| Rosiglitazone            |                 |                               |                               |                     |
| Neuschwander- Tetri (73) | 30 (14/16)      | 45 (21–68)                    | BMI > 25, 15 NGT, 7 IGT, 8 DM | NASH                |

NA, Not assessed; NR, not reported; NS, not significant; DM, diabetes mellitus; IGT, impaired glucose tolerance; NGT, normal glucose tolerance. NASH was diagnosed by liver biopsy.

studies and low-fat/high-carbohydrate diets have been shown to increase *de novo* lipogenesis (63), dietary composition can have a major effect by altering the relative sources of liver triacylglycerol.

In addition to direct effects of diet on hepatic fat accumulation, excess dietary caloric intake can result in obesity and associated insulin resistance. Insulin resistance may then contribute to the development of fatty liver by impairing the ability of insulin to suppress lipolysis, leading to increased delivery of FFAs to the liver (28, 64, 65). This hypothesis is supported by the fact that subjects with NAFLD have been shown to have elevated FFA levels (5, 28, 29) and impaired insulin suppression of lipolysis (28–30). The increased FFAs may then induce hepatic insulin resistance (66). The mechanisms whereby FFAs induce hepatic insulin resistance are unclear but may be mediated by translocation of the PKC- $\delta$  isoform from the cytosolic to the membrane compartment resulting in impairment of hepatic insulin receptor substrate (IRS)-associated phosphatidylinositol 3-kinase activity (66).

Increased *de novo* lipogenesis may also contribute to hepatic fat accumulation. Donnelly *et al.* (40) found that elevated *de novo* lipogenesis in the fasting state accounted for 26% of liver triacylglycerol in NAFLD subjects compared with 5% reported in a healthy historical control group. Increased *de novo* lipogenesis may be a result of insulin resistance and the resulting hyperinsulinemia in subjects with NAFLD, as insulin stimulates lipogenic enzymes via sterol receptor binding protein 1-c (SREBP-1c) even in the insulin-resistant state (67). Overexpression of SREBP-1c in transgenic

mice leads to increased lipogenesis and the development of hepatic steatosis (68). Inactivation of the SREBP-1c gene in livers of *ob/ob* mice, a genetic model of leptin deficiency that develops obesity and hepatic steatosis, results in an approximate 50% reduction in liver triglyceride (69). Carbohydrates can also stimulate lipogenesis by activating the carbohydrate response element binding protein leading to transcription of genes involved in glycolysis and lipogenesis, thus resulting in the conversion of excess glucose to fatty acids (70). Although carbohydrate response element binding protein activation may be more important in states of hyperglycemia, it may also contribute to the accumulation of fat in the liver during diets high in carbohydrates.

Hyperinsulinemia may also contribute to triacylglycerol accumulation in the liver by inactivating the forkhead transcription factor Foxa2 (71). Foxa2 promotes fatty acid oxidation in the liver, but is inactivated by phosphorylation by either IRS1 or IRS2 signaling pathways. Because Foxa2 remains sensitive to the actions of insulin in the liver, hyperinsulinemia, even in the fasting state, can result in full suppression of Foxa2, thus decreasing fatty acid oxidation and contributing to fat accumulation (71).

**Insulin Resistance in NAFLD—Cause or Consequence?**

Subjects with NAFLD display whole-body as well as hepatic insulin resistance, and the relative importance of each of these in the pathogenesis of NAFLD is a matter of debate.

**TABLE 1.** *Continued*

| Study type                                                | Duration      | Liver enzymes                                          | Liver fat change and assessment method                       | Histology                                                                             |
|-----------------------------------------------------------|---------------|--------------------------------------------------------|--------------------------------------------------------------|---------------------------------------------------------------------------------------|
| Open                                                      | 1 yr          | Decreased                                              | NA                                                           | NA                                                                                    |
| Open <i>vs.</i> control non-randomized                    | 3 months      | Decreased                                              | Decreased; liver biopsy                                      | (n = 25) Steatosis only improved                                                      |
| Gastric bypass cohort study                               | Average 305 d | Decreased                                              | Decreased; liver biopsy                                      | (n = 16) Improved steatosis, inflammation, ballooning, and fibrosis                   |
| Open                                                      | 1 yr          | No significant change                                  | Decreased in seven of 15, steatosis score (NS); liver biopsy | (n = 15) Trend towards improved hepatitis score ( $P = 0.06$ ), total NASH score (NS) |
| Open-label                                                | 48 wk         | Decreased at 3 months, no change from baseline at 1 yr | Three of 10 had decreased steatosis; liver biopsy            | (n = 10) Two of 10 had improved hepatitis and one of 10 had improved fibrosis         |
| Open-label                                                | 4 months      | Decreased                                              | NA                                                           | NA                                                                                    |
| Open-label <i>vs.</i> control                             | 6 months      | Decreased                                              | Decreased; ultrasound                                        | (n = 23) No significant improvement                                                   |
| Open-label <i>vs.</i> vitamin E or diet                   | 12 months     | Decreased                                              | Decreased; liver biopsy                                      | (n = 17) Improved steatosis, necroinflammation, and fibrosis                          |
| Open-label                                                | 6 months      | Decreased                                              | NA                                                           | (n = 7) Five of 7 had improved necroinflammation, no improvement fibrosis             |
| Open-label                                                | 48 wk         | Decreased                                              | Decreased; liver biopsy                                      | (n = 18) Improved steatosis, inflammation, hepatocellular injury, and fibrosis        |
| Open-label, vitamin E <i>vs.</i> vitamin E + pioglitazone | 6 months      | Decreased                                              | Decreased; liver biopsy                                      | (n = 18) Improved steatosis only combination <i>vs.</i> vitamin E alone               |
| Open-label                                                | 48 wk         | Decreased                                              | Decreased; liver/spleen ratio by CT                          | (n = 22) Improved steatosis, ballooning, and pericellular fibrosis                    |

Elegant studies using tissue-specific insulin receptor knockout mice have demonstrated that knockout mice lacking the muscle insulin receptor alone or in combination with loss of the adipocyte insulin receptor have normal glucose levels despite the presence of insulin resistance (72). However, knockout of the insulin receptor in the liver results in both fasting and postprandial hyperglycemia, and the subsequent development of peripheral insulin resistance. These mice also develop hepatic steatosis (72). Although these studies would suggest that hepatic insulin resistance is more important than peripheral muscle and adipose tissue insulin resistance in the pathogenesis of hepatic steatosis, extrapolating rodent studies to humans may not be entirely accurate. The basis for this caution is our finding that the thiazolidinediones, which have been shown in small studies in humans to decrease hepatic fat (73–76), result in fat deposition in the liver of mice on a high-fat diet (Hull, R. L., Z. Shen, S. E. Kahn, unpublished observation). Thus, when considering human studies, whether insulin resistance causes hepatic steatosis or whether the accumulation of fat in the liver is the primary event leading to hepatic and then later peripheral insulin resistance is not clear.

Patients with NAFLD typically are obese and have increased intraabdominal fat that may be responsible for their insulin resistance. As discussed above, peripheral insulin resistance might contribute to steatosis by decreasing insulin suppression of lipolysis and thus increasing delivery of FFAs to the liver and hyperinsulinemia stimulating *de novo* lipogenesis via SREBP-1c. The beneficial effects of insulin-sensitizing agents such as the thiazolidinediones and met-

formin (discussed later) on decreasing hepatic fat support this hypothesis, although direct effects of these agents on the liver cannot be excluded.

An alternative hypothesis is that fat accumulation in the liver may be the primary event leading to hepatic insulin resistance. The early development of hepatic insulin resistance, without changes in insulin-stimulated glucose uptake or body weight, has been observed in a rodent model of high-fat feeding (61). In this model, 3 d on a high-fat diet (59% fat) resulted in a 3-fold elevation in hepatic fatty acyl Co-A. Although FFA levels were elevated in the immediate postprandial period, fasting FFA levels were not different from the control-fed animals (61). When rats were fed 2,4 dinitrophenol, a mitochondrial uncoupler that results in increased energy expenditure and thus increased fat oxidation, the accumulation of fat in the liver was prevented and hepatic insulin sensitivity was improved, although not to the level of the control animals. Although a negative linear relationship between hepatic fat content and hepatic insulin sensitivity was found (61), this does not prove cause and effect. Thus, although these data are intriguing, they do not exclude an effect of elevated postprandial FFAs on hepatic insulin sensitivity or that dinitrophenol may have had direct effects on hepatic insulin sensitivity resulting in decreased hepatic fatty acyl Co-A. Studies in humans with type 2 diabetes before and after a moderately hypocaloric, very-low-fat diet, demonstrated an 81% reduction in intrahepatic lipid content that was associated with improvements in both basal and insulin-stimulated hepatic glucose metabolism, but no significant change in insulin-stimulated peripheral glucose

uptake (77). Thus, changes in dietary fat are able to alter intrahepatic lipid content and are associated with alterations in hepatic insulin sensitivity without significant changes in peripheral insulin sensitivity or fasting FFA levels.

### Treatment of Hepatic Steatosis

There is currently no established treatment for NAFLD or NASH, although weight loss and a low-fat diet are recommended. Most treatment studies have focused on subjects with NASH because this entity has the potential to progress to fibrosis and cirrhosis; however, the findings have been limited by variations in treatment endpoints and a paucity of randomized, placebo-controlled trials. Improvements in liver transaminases and histology have been demonstrated with diet and/or weight loss interventions, ursodeoxycholic acid, vitamin E, betaine, fibrates, metformin and the thiazolidinediones (78). The use of approaches such as weight loss, metformin, or thiazolidinediones has been based on the association of NAFLD with obesity and insulin resistance, with the postulate that insulin resistance is a cause rather than a consequence of hepatic steatosis. Table 1 provides a summary of clinical studies in subjects with NAFLD or NASH on the effects of weight loss, metformin, or thiazolidinedione treatment on liver transaminases, liver fat, and histology.

#### Lifestyle modification

Lifestyle changes, mostly focused on weight loss, have been demonstrated to reduce liver transaminases (79–81) and decrease liver fat content (80). A 1-yr weight loss intervention in 15 subjects with NASH that achieved only an average 3-kg weight loss resulted in an improvement in histology in nine subjects and stable histology in six. Those with improved histology were found to have had greater weight loss, improved liver transaminases, and decreased liver fat (82). Liver fat, measured by MRS, has also been shown to decrease in response to weight loss interventions in obese women (83) and in subjects with type 2 diabetes (77, 84). Although weight loss appears to be beneficial, rapid weight loss after gastrectomy has been associated with increased hepatitis despite reductions in steatosis on liver biopsy (85).

The mechanism whereby dietary weight loss results in decreased liver fat is not entirely clear, but decreased dietary fat is likely to be a major factor. Tiikkainen *et al.* (83) found that before weight loss, liver fat was related to the percent of total energy comprised of dietary fat and was not related to the amount of intraabdominal fat. Additionally, changes in liver fat with weight loss did not correlate with changes in intraabdominal fat (83). Others have shown that, when compared with age-, gender-, and BMI-matched controls, subjects with NASH eat a diet richer in saturated fat and poorer in dietary fiber and vitamins E and C, thus suggesting that dietary habits as well as antioxidant activity may be contributing factors to steatohepatitis (6).

#### Metformin

Metformin is used extensively in the treatment of patients with type 2 diabetes and has been shown in the Diabetes Prevention Program to delay the onset of the disease in subjects with impaired glucose tolerance (86). It reduces plasma glucose

levels primarily by reducing hepatic glucose production through the activation of AMP kinase (87). Activation of this key enzyme also results in decreased lipid synthesis and increased fat oxidation (87). Treatment with metformin for 4 wk in *ob/ob* mice, an obese mouse model that does not synthesize leptin, resulted in resolution of hepatic steatosis (88). Open label human studies have shown promising results. In one, metformin treatment resulted in early decreases in liver enzymes and improved insulin sensitivity in subjects with NAFLD (89). However, after 3 months, liver enzymes gradually increased to pretreatment levels. Another study in subjects with NASH showed improved insulin sensitivity, liver transaminases, and decreased liver volume after 4 months of treatment (90). A recent randomized controlled trial comparing metformin treatment to vitamin E or diet alone in nondiabetic NAFLD subjects found improved transaminases as well as improved histology after 12 months of treatment (91). In contrast, others have failed to show significant improvement in liver histology after 6 months of treatment with metformin (92), although 6 months may have not been a long enough time interval to detect significant changes in histology. Additionally, in a double-blind, randomized study of subjects with type 2 diabetes, 16 wk of treatment with metformin resulted in improved basal hepatic insulin sensitivity, decreased FFAs, and glycosylated hemoglobin, but no significant change in liver transaminases or liver fat quantified by MRS (93). Thus, further randomized, placebo-controlled trials are needed before metformin can be recommended as therapy in NAFLD.

#### Thiazolidinediones

Thiazolidinediones are insulin-sensitizing agents that have been shown to improve both hepatic as well as whole-body insulin sensitivity (94, 95). The exact mechanism whereby these agents improve insulin sensitivity is not known but may be related, in part, to changes in body fat distribution because they have been shown in humans to increase sc fat while simultaneously not changing or even decreasing intraabdominal fat (95, 96). They are also capable of inducing adipocyte differentiation and, thus, an increase in the number of small adipocytes (97), which, in turn, increases the capacity for lipid storage in fat cells. Treatment with thiazolidinediones results in consistent decreases in FFAs (95, 98, 99), thereby decreasing FFA delivery to the liver. They also increase adiponectin levels (100–103), which may help to increase lipid oxidation of fatty acids in the liver. Additionally, thiazolidinediones have been shown to decrease TNF $\alpha$  (104–106) and the inflammatory marker C-reactive protein (107–109), that may contribute to the development of insulin resistance. Thus, thiazolidinediones would appear to decrease hepatic triacylglycerol content by a number of mechanisms.

Human studies with thiazolidinediones in subjects with NASH have demonstrated improvements in liver function tests (73–76, 110), as well as an improvement in steatosis and the histological score (73, 75, 76). Work in individuals with type 2 diabetes has shown that rosiglitazone leads to a 40% decrease in hepatic triglyceride content (98). These observations suggest that the thiazolidinediones may be beneficial in their effects on the liver in individuals with hepatic steatosis, but larger studies are needed.

## Other agents

In addition to insulin-sensitizing agents, lipid-lowering medications and antioxidant and cytoprotective therapies have been tried in NAFLD and NASH. Small uncontrolled studies have shown benefits with statins (111, 112), omega-3-fatty acids (111) and fibrates (113, 114). Antioxidant therapy has been pursued as oxidative stress has been postulated to be one of the factors that may contribute to hepatocyte damage, fibrosis, and cirrhosis in NASH. Vitamin E has received the most attention, but so far studies have produced varying results (115). Ursodeoxycholic acid has been used as a potential cytoprotective agent in subjects with NASH, and although small, mostly uncontrolled, studies showed variable benefit (115), a large randomized placebo-controlled study with liver biopsy at 2 yr demonstrated improvement but no difference between the active drug and the placebo groups (116).

## Conclusions and Future Directions

NAFLD is a common liver disorder that is strongly associated with insulin resistance and type 2 diabetes. With the increase in the number of individuals who are overweight or obese, this condition will only increase in prevalence. The mechanisms underlying the development of NAFLD are not completely understood but likely involve a combination of increased FFAs and possibly decreased lipid oxidation in the liver as a result of insulin resistance. Dietary fat can play a major role in the development of NAFLD, and it is possible that hepatic steatosis caused by consumption of excess dietary fat may contribute to the hepatic insulin resistance observed in this condition. Because most treatment studies have been small and placebo treatment has frequently resulted in significant improvements in outcome measures, new treatment recommendations await large placebo-controlled randomized studies.

Future research should focus on clarifying the relationship between hepatic and peripheral insulin resistance and the development of hepatic steatosis. Additionally, information is needed to determine the environmental and genetic factors that predispose some patients to develop NASH, especially as diet may play a key role in the development of NAFLD and perhaps in the progression from NAFLD to NASH. In terms of medical therapy, large, placebo-controlled studies are currently underway to investigate the therapeutic benefits of insulin-sensitizing medications and vitamin E. Investigation of other treatment options such as lipid-lowering medications, antioxidants, or cytoprotective agents should continue. The results of these studies are eagerly awaited to provide better recommendations for treatment of this condition.

## Acknowledgments

Dr. Matthew Yeh (Department of Pathology, University of Washington) kindly provided the histology photomicrographs.

Received March 16, 2006. Accepted September 5, 2006.

Address all correspondence and requests for reprints to: Kristina M. Utzschneider, M.D., Veterans Affairs Puget Sound Health Care System (151), 1660 South Columbian Way, Seattle, Washington 98108. E-mail: kutzschn@u.washington.edu.

This work was supported by the Medical Research Service and the Research Enhancement Award Program, Veterans Affairs Puget Sound

Health Care System. K.M.U. is the recipient of a Department of Veterans Affairs Career Development Award, and S.E.K. is the recipient of an American Diabetes Association Distinguished Clinical Scientist Award. Disclosure summary: The authors have nothing to disclose.

## References

- Matteoni CA, Younossi ZM, Gramlich T, Boparai N, Liu YC, McCullough AJ 1999 Nonalcoholic fatty liver disease: a spectrum of clinical and pathological severity. *Gastroenterology* 116:1413–1419
- Teli MR, James OF, Burt AD, Bennett MK, Day CP 1995 The natural history of nonalcoholic fatty liver: a follow-up study. *Hepatology* 22:1714–1719
- Lee RG 1989 Nonalcoholic steatohepatitis: a study of 49 patients. *Hum Pathol* 20:594–598
- Chitturi S, Abeygunasekera S, Farrell GC, Holmes-Walker J, Hui JM, Fung C, Karim R, Lin R, Samarasinghe D, Liddle C, Weltman M, George J 2002 NASH and insulin resistance: insulin hypersecretion and specific association with the insulin resistance syndrome. *Hepatology* 35:373–379
- Chalasani N, Deeg MA, Persohn S, Crabb DW 2003 Metabolic and anthropometric evaluation of insulin resistance in nondiabetic patients with non-alcoholic steatohepatitis. *Am J Gastroenterol* 98:1849–1855
- Musso G, Gambino R, De Micheli F, Cassader M, Rizzetto M, Durazzo M, Faga E, Silli B, Pagano G 2003 Dietary habits and their relations to insulin resistance and postprandial lipemia in nonalcoholic steatohepatitis. *Hepatology* 37:909–916
- Cassader M, Gambino R, Musso G, Depetris N, Mecca F, Cavallo-Perin P, Pacini G, Rizzetto M, Pagano G 2001 Postprandial triglyceride-rich lipoprotein metabolism and insulin sensitivity in nonalcoholic steatohepatitis patients. *Lipids* 36:1117–1124
- Willner IR, Waters B, Patil SR, Reuben A, Morelli J, Riely CA 2001 Ninety patients with nonalcoholic steatohepatitis: insulin resistance, familial tendency, and severity of disease. *Am J Gastroenterol* 96:2957–2961
- Tiikkainen M, Tamminen M, Hakkinen AM, Bergholm R, Vehkavaara S, Halavaara J, Teramo K, Rissanen A, Yki-Jarvinen H 2002 Liver-fat accumulation and insulin resistance in obese women with previous gestational diabetes. *Obes Res* 10:859–867
- Sanyal AJ, Campbell-Sargent C, Mirshahi F, Rizzo WB, Contos MJ, Sterling RK, Luketic VA, Shiffman ML, Clore JN 2001 Nonalcoholic steatohepatitis: association of insulin resistance and mitochondrial abnormalities. *Gastroenterology* 120:1183–1192
- Ground KE 1982 Liver pathology in aircrew. *Aviat Space Environ Med* 53:14–18
- Hilden M, Christoffersen P, Juhl E, Dalgaard JB 1977 Liver histology in a “normal” population—examinations of 503 consecutive fatal traffic casualties. *Scand J Gastroenterol* 12:593–597
- Bellentani S, Saccoccio G, Masutti F, Croce LS, Brandi G, Sasso F, Cristanini G, Tiribelli C 2000 Prevalence of and risk factors for hepatic steatosis in Northern Italy. *Ann Intern Med* 132:112–117
- Dixon JB, Bhathal PS, O'Brien PE 2001 Nonalcoholic fatty liver disease: predictors of nonalcoholic steatohepatitis and liver fibrosis in the severely obese. *Gastroenterology* 121:91–100
- Garcia-Monzon C, Martin-Perez E, Iacono OL, Fernandez-Bermejo M, Majano PL, Apolinario A, Larranaga E, Moreno-Otero R 2000 Characterization of pathogenic and prognostic factors of nonalcoholic steatohepatitis associated with obesity. *J Hepatol* 33:716–724
- Gupte P, Amarapurkar D, Agal S, Bajjal R, Kulshrestha P, Pramanik S, Patel N, Madan A, Amarapurkar A, Hafeezunnisa 2004 Non-alcoholic steatohepatitis in type 2 diabetes mellitus. *J Gastroenterol Hepatol* 19:854–858
- Akbar DH, Kawther AH 2003 Nonalcoholic fatty liver disease in Saudi type 2 diabetic subjects attending a medical outpatient clinic: prevalence and general characteristics. *Diabetes Care* 26:3351–3352
- Targher G, Bertolini L, Poli F, Rodella S, Scala L, Tessari R, Zenari L, Falezza G 2005 Nonalcoholic fatty liver disease and risk of future cardiovascular events among type 2 diabetic patients. *Diabetes* 54:3541–3546
- Vozaarova B, Stefan N, Lindsay RS, Saremi A, Pratley RE, Bogardus C, Tataranni PA 2002 High alanine aminotransferase is associated with decreased hepatic insulin sensitivity and predicts the development of type 2 diabetes. *Diabetes* 51:1889–1895
- Wanless IR, Lentz JS 1990 Fatty liver hepatitis (steatohepatitis) and obesity: an autopsy study with analysis of risk factors. *Hepatology* 12:1106–1110
- Hamaguchi M, Kojima T, Takeda N, Nakagawa T, Taniguchi H, Fujii K, Omatsu T, Nakajima T, Sarui H, Shimazaki M, Kato T, Okuda J, Ida K 2005 The metabolic syndrome as a predictor of nonalcoholic fatty liver disease. *Ann Intern Med* 143:722–728
- Fan JG, Zhu J, Li XJ, Chen L, Lu YS, Li L, Dai F, Li F, Chen SY 2005 Fatty liver and the metabolic syndrome among Shanghai adults. *J Gastroenterol Hepatol* 20:1825–1832
- Browning JD, Szczepaniak LS, Dobbins R, Nuremberg P, Horton JD, Cohen JC, Grundy SM, Hobbs HH 2004 Prevalence of hepatic steatosis in an urban population in the United States: impact of ethnicity. *Hepatology* 40:1387–1395

24. Flegal KM, Carroll MD, Ogden CL, Johnson CL 2002 Prevalence and trends in obesity among US adults, 1999–2000. *JAMA* 288:1723–1727
25. Moran JR, Ghishan FK, Halter SA, Greene HL 1983 Steatohepatitis in obese children: a cause of chronic liver dysfunction. *Am J Gastroenterol* 78:374–377
26. Baldridge AD, Perez-Atayde AR, Graeme-Cook F, Higgins L, Lavine JE 1995 Idiopathic steatohepatitis in childhood: a multicenter retrospective study. *J Pediatr* 127:700–704
27. Chitturi S, Farrell GC 2001 Etiopathogenesis of nonalcoholic steatohepatitis. *Semin Liver Dis* 21:27–41
28. Marchesini G, Brizi M, Bianchi G, Tomassetti S, Bugianesi E, Lenzi M, McCullough AJ, Natale S, Forlani G, Melchionda N 2001 Nonalcoholic fatty liver disease: a feature of the metabolic syndrome. *Diabetes* 50:1844–1850
29. Bugianesi E, Gastaldelli A, Vanni E, Gambino R, Cassader M, Baldi S, Ponti V, Pagano G, Ferrannini E, Rizzetto M 2005 Insulin resistance in non-diabetic patients with non-alcoholic fatty liver disease: sites and mechanisms. *Diabetologia* 48:634–642
30. Seppala-Landroos A, Vehkavaara S, Hakkinen AM, Goto T, Westerbacka J, Sovijarvi A, Halavaara J, Yki-Jarvinen H 2002 Fat accumulation in the liver is associated with defects in insulin suppression of glucose production and serum free fatty acids independent of obesity in normal men. *J Clin Endocrinol Metab* 87:3023–3028
31. Cnop M, Landchild MJ, Vidal J, Havel PJ, Knowles NG, Carr DR, Wang F, Hull RL, Boyko EJ, Retzlaff BM, Walden CE, Knopp RH, Kahn SE 2002 The concurrent accumulation of intra-abdominal and subcutaneous fat explains the association between insulin resistance and plasma leptin concentrations: distinct metabolic effects of two fat compartments. *Diabetes* 51:1005–1015
32. Boyko EJ, Fujimoto WY, Leonetti DL, Newell-Morris L 2000 Visceral adiposity and risk of type 2 diabetes: a prospective study among Japanese Americans. *Diabetes Care* 23:465–471
33. Miyazaki Y, Glass L, Triplitt C, Wajsborg E, Mandarino LJ, DeFronzo RA 2002 Abdominal fat distribution and peripheral and hepatic insulin resistance in type 2 diabetes mellitus. *Am J Physiol Endocrinol Metab* 283:E1135–E1143
34. Hayashi T, Boyko EJ, Leonetti DL, McNeely MJ, Newell-Morris L, Kahn SE, Fujimoto WY 2003 Visceral adiposity and the risk of impaired glucose tolerance: a prospective study among Japanese Americans. *Diabetes Care* 26:650–655
35. Nieves DJ, Cnop M, Retzlaff B, Walden CE, Brunzell JD, Knopp RH, Kahn SE 2003 The atherogenic lipoprotein profile associated with obesity and insulin resistance is largely attributable to intra-abdominal fat. *Diabetes* 52:172–179
36. Nicklas BJ, Penninx BW, Ryan AS, Berman DM, Lynch NA, Dennis KE 2003 Visceral adipose tissue cutoffs associated with metabolic risk factors for coronary heart disease in women. *Diabetes Care* 26:1413–1420
37. Carr DB, Utzschneider KM, Hull RL, Kodama K, Retzlaff BM, Brunzell JD, Shofer JB, Fish BE, Knopp RH, Kahn SE 2004 Intra-abdominal fat is a major determinant of the National Cholesterol Education Program Adult Treatment Panel III criteria for the metabolic syndrome. *Diabetes* 53:2087–2094
38. Kelley DE, McKolanis TM, Hegazi RA, Kuller LH, Kalhan SC 2003 Fatty liver in type 2 diabetes mellitus: relation to regional adiposity, fatty acids, and insulin resistance. *Am J Physiol Endocrinol Metab* 285:E906–E916
39. Nguyen-Duy TB, Nichaman MZ, Church TS, Blair SN, Ross R 2003 Visceral fat and liver fat are independent predictors of metabolic risk factors in men. *Am J Physiol Endocrinol Metab* 284:E1065–E1071
40. Donnelly KL, Smith CI, Schwarzenberg SJ, Jessurun J, Boldt MD, Parks EJ 2005 Sources of fatty acids stored in liver and secreted via lipoproteins in patients with nonalcoholic fatty liver disease. *J Clin Invest* 115:1343–1351
41. Jensen MD, Johnson CM 1996 Contribution of leg and splanchnic free fatty acid (FFA) kinetics to postabsorptive FFA flux in men and women. *Metabolism* 45:662–666
42. Basu A, Basu R, Shah P, Vella A, Rizza RA, Jensen MD 2001 Systemic and regional free fatty acid metabolism in type 2 diabetes. *Am J Physiol Endocrinol Metab* 280:E1000–E1006
43. Garg A 2004 Acquired and inherited lipodystrophies. *N Engl J Med* 350:1220–1234
44. Cnop M, Havel PJ, Utzschneider KM, Carr DB, Sinha MK, Boyko EJ, Retzlaff BM, Knopp RH, Brunzell JD, Kahn SE 2003 Relationship of adiponectin to body fat distribution, insulin sensitivity and plasma lipoproteins: evidence for independent roles of age and sex. *Diabetologia* 46:459–469
45. Yamauchi T, Kamon J, Minokoshi Y, Ito Y, Waki H, Uchida S, Yamashita S, Noda M, Kita S, Ueki K, Eto K, Akanuma Y, Froguel P, Foufelle F, Ferre P, Carling D, Kimura S, Nagai R, Kahn BB, Kadowaki T 2002 Adiponectin stimulates glucose utilization and fatty-acid oxidation by activating AMP-activated protein kinase. *Nat Med* 8:1288–1295
46. Hui JM, Hodge A, Farrell GC, Kench JG, Kriketos A, George J 2004 Beyond insulin resistance in NASH: TNF- $\alpha$  or adiponectin? *Hepatology* 40:46–54
47. Bugianesi E, Pagotto U, Manini R, Vanni E, Gastaldelli A, de Iasio R, Gentilecore E, Natale S, Cassader M, Rizzetto M, Pasquali R, Marchesini G 2005 Plasma adiponectin in nonalcoholic fatty liver is related to hepatic insulin resistance and hepatic fat content, not to liver disease severity. *J Clin Endocrinol Metab* 90:3498–3504
48. Bajaj M, Suraamornkul S, Hardies LJ, Pratipanawatr T, DeFronzo RA 2004 Plasma resistin concentration, hepatic fat content, and hepatic and peripheral insulin resistance in pioglitazone-treated type II diabetic patients. *Int J Obes Relat Metab Disord* 28:783–789
49. Xu A, Wang Y, Keshaw H, Xu LY, Lam KS, Cooper GJ 2003 The fat-derived hormone adiponectin alleviates alcoholic and nonalcoholic fatty liver diseases in mice. *J Clin Invest* 112:91–100
50. Romano M, Guagnano MT, Pacini G, Vigneri S, Falco A, Marinopiccoli M, Manigrasso MR, Basili S, Davi G 2003 Association of inflammation markers with impaired insulin sensitivity and coagulative activation in obese healthy women. *J Clin Endocrinol Metab* 88:5321–5326
51. Yudkin JS, Stehouwer CD, Emeis JJ, Coppock SW 1999 C-reactive protein in healthy subjects: associations with obesity, insulin resistance, and endothelial dysfunction: a potential role for cytokines originating from adipose tissue? *Arterioscler Thromb Vasc Biol* 19:972–978
52. Kern PA, Ranganathan S, Li C, Wood L, Ranganathan G 2001 Adipose tissue tumor necrosis factor and interleukin-6 expression in human obesity and insulin resistance. *Am J Physiol Endocrinol Metab* 280:E745–E751
53. Fernandez-Real JM, Vayreda M, Richart C, Gutierrez C, Broch M, Vendrell J, Ricart W 2001 Circulating interleukin 6 levels, blood pressure, and insulin sensitivity in apparently healthy men and women. *J Clin Endocrinol Metab* 86:1154–1159
54. Esposito K, Pontillo A, Di Palo C, Giugliano G, Masella M, Marfella R, Giugliano D 2003 Effect of weight loss and lifestyle changes on vascular inflammatory markers in obese women: a randomized trial. *JAMA* 289:1799–1804
55. Escobar-Morreale HF, Villuendas G, Botella-Carretero JJ, Sancho J, San Millan JL 2003 Obesity, and not insulin resistance, is the major determinant of serum inflammatory cardiovascular risk markers in pre-menopausal women. *Diabetologia* 46:625–633
56. Miyazaki Y, Pipek R, Mandarino LJ, DeFronzo RA 2003 Tumor necrosis factor  $\alpha$  and insulin resistance in obese type 2 diabetic patients. *Int J Obes Relat Metab Disord* 27:88–94
57. Crespo J, Fernandez-Gil P, Hernandez-Guerra M, Cayon A, Mayorga M, Dominguez-Diez A, Fernandez-Escalante JC, Pons-Romero F 2001 Are there predictive factors of severe liver fibrosis in morbidly obese patients with non-alcoholic steatohepatitis? *Obes Surg* 11:254–257
58. Kugelmas M, Hill DB, Vivian B, Marsano L, McClain CJ 2003 Cytokines and NASH: a pilot study of the effects of lifestyle modification and vitamin E. *Hepatology* 38:413–419
59. Crespo J, Cayon A, Fernandez-Gil P, Hernandez-Guerra M, Mayorga M, Dominguez-Diez A, Fernandez-Escalante JC, Pons-Romero F 2001 Gene expression of tumor necrosis factor  $\alpha$  and TNF-receptors, p55 and p75, in nonalcoholic steatohepatitis patients. *Hepatology* 34:1158–1163
60. Kim SP, Elmerer M, Van Citters GW, Bergman RN 2003 Primacy of hepatic insulin resistance in the development of the metabolic syndrome induced by an isocaloric moderate-fat diet in the dog. *Diabetes* 52:2453–2460
61. Samuel VT, Liu ZX, Qu X, Elder BD, Bilz S, Befroy D, Romanelli AJ, Shulman GI 2004 Mechanism of hepatic insulin resistance in non-alcoholic fatty liver disease. *J Biol Chem* 279:32345–32353
62. Westerbacka J, Lammi K, Hakkinen AM, Rissanen A, Salminen I, Aro A, Yki-Jarvinen H 2005 Dietary fat content modifies liver fat in overweight nondiabetic subjects. *J Clin Endocrinol Metab* 90:2804–2809
63. Hudgins LC, Hellerstein M, Seidman C, Neese R, Diakun J, Hirsch J 1996 Human fatty acid synthesis is stimulated by a eucaloric low fat, high carbohydrate diet. *J Clin Invest* 97:2081–2091
64. Day C, Saksena S 2002 Non-alcoholic steatohepatitis: definitions and pathogenesis. *J Gastroenterol Hepatol* 17(Suppl 3):S377–S384
65. Luyckx FH, Lefebvre PJ, Scheen AJ 2000 Non-alcoholic steatohepatitis: association with obesity and insulin resistance, and influence of weight loss. *Diabetes Metab* 26:98–106
66. Lam TK, Carpentier A, Lewis GF, van de Werve G, Fantus IG, Giacca A 2003 Mechanisms of the free fatty acid-induced increase in hepatic glucose production. *Am J Physiol Endocrinol Metab* 284:E863–E873
67. Tamura S, Shimomura I 2005 Contribution of adipose tissue and de novo lipogenesis to nonalcoholic fatty liver disease. *J Clin Invest* 115:1139–1142
68. Shimano H, Horton JD, Shimomura I, Hammer RE, Brown MS, Goldstein JL 1997 Isoform 1c of sterol regulatory element binding protein is less active than isoform 1a in livers of transgenic mice and in cultured cells. *J Clin Invest* 99:846–854
69. Yahagi N, Shimano H, Hasty AH, Matsuzaka T, Ide T, Yoshikawa T, Amemiya-Kudo M, Tomita S, Okazaki H, Tamura Y, Iizuka Y, Ohashi K, Osuga J, Harada K, Gotoda T, Nagai R, Ishibashi S, Yamada N 2002 Absence of sterol regulatory element-binding protein-1 (SREBP-1) ameliorates fatty livers but not obesity or insulin resistance in Lep(ob)/Lep(ob) mice. *J Biol Chem* 277:19353–19357
70. Browning JD, Horton JD 2004 Molecular mediators of hepatic steatosis and liver injury. *J Clin Invest* 114:147–152
71. Wolfrum C, Asilmaz E, Luca E, Friedman JM, Stoffel M 2004 Foxa2 regulates lipid metabolism and ketogenesis in the liver during fasting and in diabetes. *Nature* 432:1027–1032
72. Biddinger SB, Kahn CR 2006 From mice to men: insights into the insulin resistance syndromes. *Annu Rev Physiol* 68:123–158
73. Neuschwander-Tetri BA, Brunet EM, Wehmer KR, Oliver D, Bacon BR 2003 Improved nonalcoholic steatohepatitis after 48 weeks of treatment with the PPAR- $\gamma$  ligand rosiglitazone. *Hepatology* 38:1008–1017
74. Azuma T, Tomita K, Kato S, Adachi M, Inokuchi N, Kitamura N, Nishimura

- T, Ishii H 2002 A pilot study of a thiazolidinedione, pioglitazone, in nonalcoholic steatohepatitis. *Hepatology* 36:A406
75. Sanyal AJ, Mofrad PS, Contos MJ, Sargeant C, Luketic VA, Sterling RK, Stravitz RT, Shiffman ML, Clore J, Mills AS 2004 A pilot study of vitamin E versus vitamin E and pioglitazone for the treatment of nonalcoholic steatohepatitis. *Clin Gastroenterol Hepatol* 2:1107–1115
76. Promrat K, Lutchman G, Uwaifo G, Freedman R, Soza A, Heller T, Doo E, Ghany M, Premkumar A, Park Y, Liang T, Yanovski J, Kleiner D, Hoofnagle J 2004 A pilot study of pioglitazone treatment for nonalcoholic steatohepatitis. *Hepatology* 39:188–196
77. Petersen KF, Dufour S, Befroy D, Lehrke M, Hendler RE, Shulman GI 2005 Reversal of nonalcoholic hepatic steatosis, hepatic insulin resistance, and hyperglycemia by moderate weight reduction in patients with type 2 diabetes. *Diabetes* 54:603–608
78. Neuschwander-Tetri BA, Caldwell SH 2003 Nonalcoholic steatohepatitis: summary of an AASLD Single Topic Conference. *Hepatology* 37:1202–1219
79. Park HS, Kim MW, Shin ES 1995 Effect of weight control on hepatic abnormalities in obese patients with fatty liver. *J Korean Med Sci* 10:414–421
80. Ueno T, Sugawara H, Sujaku K, Hashimoto O, Tsuji R, Tamaki S, Torimura T, Inuzuka S, Sata M, Tanikawa K 1997 Therapeutic effects of restricted diet and exercise in obese patients with fatty liver. *J Hepatol* 27:103–107
81. Suzuki A, Lindor K, St Saver J, Lymp J, Mendes F, Muto A, Okada T, Angulo P 2005 Effect of changes on body weight and lifestyle in nonalcoholic fatty liver disease. *J Hepatol* 43:1060–1066
82. Huang MA, Greenon JK, Chao C, Anderson L, Peterman D, Jacobson J, Emick D, Lok AS, Conjeevaram HS 2005 One-year intense nutritional counseling results in histological improvement in patients with non-alcoholic steatohepatitis: a pilot study. *Am J Gastroenterol* 100:1072–1081
83. Tiikkainen M, Bergholm R, Vehkavaara S, Rissanen A, Hakkinen AM, Tamminen M, Teramo K, Yki-Jarvinen H 2003 Effects of identical weight loss on body composition and features of insulin resistance in obese women with high and low liver fat content. *Diabetes* 52:701–707
84. Tamura Y, Tanaka Y, Sato F, Choi JB, Watada H, Niwa M, Kinoshita J, Ooka A, Kumashiro N, Igarashi Y, Kyogoku S, Maehara T, Kawasumi M, Hirose T, Kawamori R 2005 Effects of diet and exercise on muscle and liver intracellular lipid contents and insulin sensitivity in type 2 diabetic patients. *J Clin Endocrinol Metab* 90:3191–3196
85. Luyckx FH, Desai C, Thiry A, Dewe W, Scheen AJ, Gielen JE, Lefebvre PJ 1998 Liver abnormalities in severely obese subjects: effect of drastic weight loss after gastrectomy. *Int J Obes Relat Metab Disord* 22:222–226
86. Knowler WC, Barrett-Connor E, Fowler SE, Hamman RF, Lachin JM, Walker EA, Nathan DM 2002 Reduction in the incidence of type 2 diabetes with lifestyle intervention or metformin. *N Engl J Med* 346:393–403
87. Zhou G, Myers R, Li Y, Chen Y, Shen X, Fenyk-Melody J, Wu M, Ventre J, Doebber T, Fujii N, Musi N, Hirshman MF, Goodyear LJ, Moller DE 2001 Role of AMP-activated protein kinase in mechanism of metformin action. *J Clin Invest* 108:1167–1174
88. Lin HZ, Yang SQ, Chuckaree C, Kuhajda F, Ronnet G, Diehl AM 2000 Metformin reverses fatty liver disease in obese, leptin-deficient mice. *Nat Med* 6:998–1003
89. Nair S, Diehl AM, Wiseman M, Farr Jr GH, Perrillo RP 2004 Metformin in the treatment of non-alcoholic steatohepatitis: a pilot open label trial. *Aliment Pharmacol Ther* 20:23–28
90. Marchesini G, Brizi M, Bianchi G, Tomassetti S, Zoli M, Melchionda N 2001 Metformin in non-alcoholic steatohepatitis. *Lancet* 358:893–894
91. Bugianesi E, Gentilecore E, Manini R, Natale S, Vanni E, Villanova N, David E, Rizzetto M, Marchesini G 2005 A randomized controlled trial of metformin versus vitamin E or prescriptive diet in nonalcoholic fatty liver disease. *Am J Gastroenterol* 100:1082–1090
92. Uygun A, Kadayifci A, Isik AT, Ozturk T, Deveci S, Tuzun A, Yesilova Z, Gulsen M, Dagalp K 2004 Metformin in the treatment of patients with non-alcoholic steatohepatitis. *Aliment Pharmacol Ther* 19:537–544
93. Tiikkainen M, Hakkinen AM, Korshennikova E, Nyman T, Makimattila S, Yki-Jarvinen H 2004 Effects of rosiglitazone and metformin on liver fat content, hepatic insulin resistance, insulin clearance, and gene expression in adipose tissue in patients with type 2 diabetes. *Diabetes* 53:2169–2176
94. Miyazaki Y, Glass L, Triplitt C, Matsuda M, Cusi K, Mahankali A, Mahankali S, Mandarino LJ, DeFronzo RA 2001 Effect of rosiglitazone on glucose and non-esterified fatty acid metabolism in type II diabetic patients. *Diabetologia* 44:2210–2219
95. Miyazaki Y, Mahankali A, Matsuda M, Mahankali S, Hardies J, Cusi K, Mandarino LJ, DeFronzo RA 2002 Effect of pioglitazone on abdominal fat distribution and insulin sensitivity in type 2 diabetic patients. *J Clin Endocrinol Metab* 87:2784–2791
96. Virtanen K, Hallsten K, Parkkola R, Janatuinen T, Lonnqvist F, Viljanen T, Ronnema T, Knuuti J, Huupponen R, Lonnroth P, Nuutila P 2003 Differential effects of rosiglitazone and metformin on adipose tissue distribution and glucose uptake in type 2 diabetic subjects. *Diabetes* 52:283–290
97. de Souza CJ, Eckhardt M, Gagen K, Dong M, Chen W, Laurent D, Burkey BF 2001 Effects of pioglitazone on adipose tissue remodeling within the setting of obesity and insulin resistance. *Diabetes* 50:1863–1871
98. Mayerson AB, Hundal RS, Dufour S, Lebon V, Befroy D, Cline GW, Enoksson S, Inzucchi SE, Shulman GI, Petersen KF 2002 The effects of rosiglitazone on insulin sensitivity, lipolysis, and hepatic and skeletal muscle triglyceride content in patients with type 2 diabetes. *Diabetes* 51:797–802
99. Gomez-Perez FJ, Aguilar-Salinas CA, Vazquez-Chavez C, Fanghanel-Salmon G, Gallegos-Martinez J, Gomez-Diaz RA, Salinas-Orozco S, Chavira-Lopez JJ, Sanchez-Reyes L, Torres-Acosta EM, Tamez R, Lopez A, Guillen LE, Cesarman G 2002 Further insight on the hypoglycemic and nonhypoglycemic effects of troglitazone 400 or 600 mg/d: effects on the very-low-density and high-density lipoprotein particle distribution. *Metabolism* 51:44–51
100. Yu JG, Javorschi S, Hevener AL, Kruszynska YT, Norman RA, Sinha M, Olefsky JM 2002 The effect of thiazolidinediones on plasma adiponectin levels in normal, obese, and type 2 diabetic subjects. *Diabetes* 51:2968–2974
101. Phillips SA, Ciaraldi TP, Kong AP, Bandukwala R, Aroda V, Carter L, Baxi S, Mudaliar SR, Henry RR 2003 Modulation of circulating and adipose tissue adiponectin levels by antidiabetic therapy. *Diabetes* 52:667–674
102. Yang WS, Jeng CY, Wu TJ, Tanaka S, Funahashi T, Matsuzawa Y, Wang JP, Chen CL, Tai TY, Chuang LM 2002 Synthetic peroxisome proliferator-activated receptor- $\gamma$  agonist, rosiglitazone, increases plasma levels of adiponectin in type 2 diabetic patients. *Diabetes Care* 25:376–380
103. Pajvani UB, Hawkins M, Combs TP, Rajala MW, Doebber T, Berger JP, Wagner JA, Wu M, Knopps A, Xiang AH, Utzschneider KM, Kahn SE, Olefsky JM, Buchanan TA, Scherer PE 2004 Complex distribution, not absolute amount of adiponectin, correlates with thiazolidinedione-mediated improvement in insulin sensitivity. *J Biol Chem* 279:12152–12162
104. Singh Ahuja H, Liu S, Crombie DL, Boehm M, Leibowitz MD, Heyman RA, Depre C, Nagy L, Tontonoz P, Davies PJ 2001 Differential effects of rosiglitazone and thiazolidinediones on metabolic gene expression in diabetic rodents. *Mol Pharmacol* 59:765–773
105. Marx N, Kehrle B, Kohlhammer K, Grub M, Koenig W, Hombach V, Libby P, Plutzky J 2002 PPAR activators as antiinflammatory mediators in human T lymphocytes: implications for atherosclerosis and transplantation-associated arteriosclerosis. *Circ Res* 90:703–710
106. Marx N, Froehlich J, Siam L, Itner J, Wierse G, Schmidt A, Scharnagl H, Hombach V, Koenig W 2003 Antidiabetic PPAR  $\gamma$ -activator rosiglitazone reduces MMP-9 serum levels in type 2 diabetic patients with coronary artery disease. *Arterioscler Thromb Vasc Biol* 23:283–288
107. Raji A, Seely EW, Bekins SA, Williams GH, Simonson DC 2003 Rosiglitazone improves insulin sensitivity and lowers blood pressure in hypertensive patients. *Diabetes Care* 26:172–178
108. Kernan WN, Inzucchi SE, Viscoli CM, Brass LM, Bravata DM, Shulman GI, McVeety JC, Horwitz RI 2003 Pioglitazone improves insulin sensitivity among nondiabetic patients with a recent transient ischemic attack or ischemic stroke. *Stroke* 34:1431–1436
109. Wang TD, Chen WJ, Lin JW, Chen MF, Lee YT 2004 Effects of rosiglitazone on endothelial function, C-reactive protein, and components of the metabolic syndrome in nondiabetic patients with the metabolic syndrome. *Am J Cardiol* 93:362–365
110. Acosta R, Molina E, O'Brien C, Cobo M, Amaro R, Neff G, Schiff E 2001 The use of pioglitazone in nonalcoholic steatohepatitis. *Gastroenterology* 120:A546
111. Hatzitolios A, Savopoulos C, Lazaraki G, Sidiropoulos I, Haritanti P, Lefkopoulou A, Karagiannopoulou G, Tzioufa V, Dimitrios K 2004 Efficacy of omega-3 fatty acids, atorvastatin and orlistat in non-alcoholic fatty liver disease with dyslipidemia. *Indian J Gastroenterol* 23:131–134
112. Rallidis LS, Drakoulis CK, Parasi AS 2004 Pravastatin in patients with nonalcoholic steatohepatitis: results of a pilot study. *Atherosclerosis* 174:193–196
113. Ogawa Y, Murata Y, Saibara T, Nishioka A, Kariya S, Yoshida S 2003 Follow-up CT findings of tamoxifen-induced non-alcoholic steatohepatitis (NASH) of breast cancer patients treated with bezafibrate. *Oncol Rep* 10:1473–1478
114. Basaranoglu M, Acbay O, Sonsuz A 1999 A controlled trial of gemfibrozil in the treatment of patients with nonalcoholic steatohepatitis. *J Hepatol* 31:384
115. Chang CY, Argo CK, Al-Osaimi AM, Caldwell SH 2006 Therapy of NAFLD: antioxidants and cytoprotective agents. *J Clin Gastroenterol* 40:S51–S60
116. Lindor KD, Kowdley KV, Heathcote EJ, Harrison ME, Jorgensen R, Angulo P, Lymp JF, Burgart L, Colin P 2004 Ursodeoxycholic acid for treatment of nonalcoholic steatohepatitis: results of a randomized trial. *Hepatology* 39:770–778
117. Clark JM, Alkhuraishi AR, Solga SF, Alli P, Diehl AM, Magnuson TH 2005 Roux-en-Y gastric bypass improves liver histology in patients with non-alcoholic fatty liver disease. *Obes Res* 13:1180–1186
118. Caldwell SH, Hespenheide EE, Redick JA, Iezzoni JC, Battle EH, Sheppard BL 2001 A pilot study of a thiazolidinedione, troglitazone, in nonalcoholic steatohepatitis. *Am J Gastroenterol* 96:519–525
